# Supplementary material for: Psychosocial predictors of treatment outcome for trauma-affected refugees
Source: PubMed Central journal article supplement (PMC4889772; doi:10.3402/ejpt.v7.30907), 2016-05-31
Supplement: EJPT-7-30907-s002.pdf [file EJPT-7-30907-s002.pdf]

Psychospołeczne predyktory efektywności leczenia uchodźców narażonych na traumę.

Charlotte Sonne, Jessica Carlsson, Per Bech, Erik Vindbjerg, Erik Lykke Mortensen, Ask Elklit

**Wprowadzenie:** Badania na temat skuteczności leczenia uchodźców narażonych na traumę wykazują dużą zmienność wyników. Nadal jednak nie wiadomo, dlaczego niektórzy pacjenci tego rodzaju korzystają z leczenia, a inni nie.

**Cel:** Celem niniejszego badania była analiza potencjalnych, psychospołecznych predyktorów efektywności leczenia uchodźców narażonych na traumę.

**Metoda:** W badaniu wzięła udział grupa 195 dorosłych uchodźców z diagnozą PTSD, którzy zostali zakwalifikowani do sześciomiesięcznego leczenia. Wykorzystano tzw. CTP Predictor Index, mierzący 15 różnych potencjalnych psychospołecznych predyktorów efektywności leczenia, włączając w to przeszłość pacjenta, chroniczność problemów psychicznych, ból, motywacje do leczenia i zaangażowanie w psychoterapię. Wykorzystano w tym badaniu następujące kwestionariusze: "Harvard Trauma Questionnaire (HTQ), Hopkins Symptom Check List-25WHO-5 well-being index, Sheehan Disability Scale, Hamilton Depression and Anxiety scales the somatisation scale of the Symptoms Checklist-90, Global Assessment of Functioning scales and pain rated on visual analogue scales". Badano relację pomiędzy wynikami leczenia oraz odpowiednimi danymi na CTP Predictor Index.

**Wyniki:** Ogólny wynik w CTP Predictor Index był istotnie skorelowany z wynikami leczenia przed- i po terapii. CTP Predictor Index korelował istotnie ze zmianami w nasileniu depresji oraz symptomami lęku, ale wielkość współczynników korelacji była umiarkowana.

**Konkluzje:** Ogólny wynik w CTP Predictor Index był istotnie skorelowany z wynikami leczenia przed- i po terapii, choć wartości współczynników korelacji były umiarkowane.

**Keywords:** Uchodźca; trauma; leczenia; zaburzenia stresowe, potraumatyczny; depresja.

**Name of translator:** Marcin Rzeszutek, University of Finance and Management in Warsaw, Poland

**Citation:** European Journal of Psychotraumatology 2016, 7: 30907 - <http://dx.doi.org/10.3402/ejpt.v7.30907>
